# Supplementary material for: Maximizing the photo catalytic and photo response properties of multimodal plasmonic Ag/WO3−xheterostructure nanorods by variation of the Ag size
Source: Royal Society of Chemistry journal article supplement (doi:10.1039/c5nr05185a), 2015-01-01
Supplement: c5nr05185a1.pdf [file c5nr05185a1.pdf]

## Maximizing the photo catalytic and photo response properties of multimodal plasmonic Ag/WO<sub>3-x</sub> heterostructure nanorods by variation of Ag size

Sirshendu Ghosh\*, Manas Saha, Sumana Paul and S. K. De\*

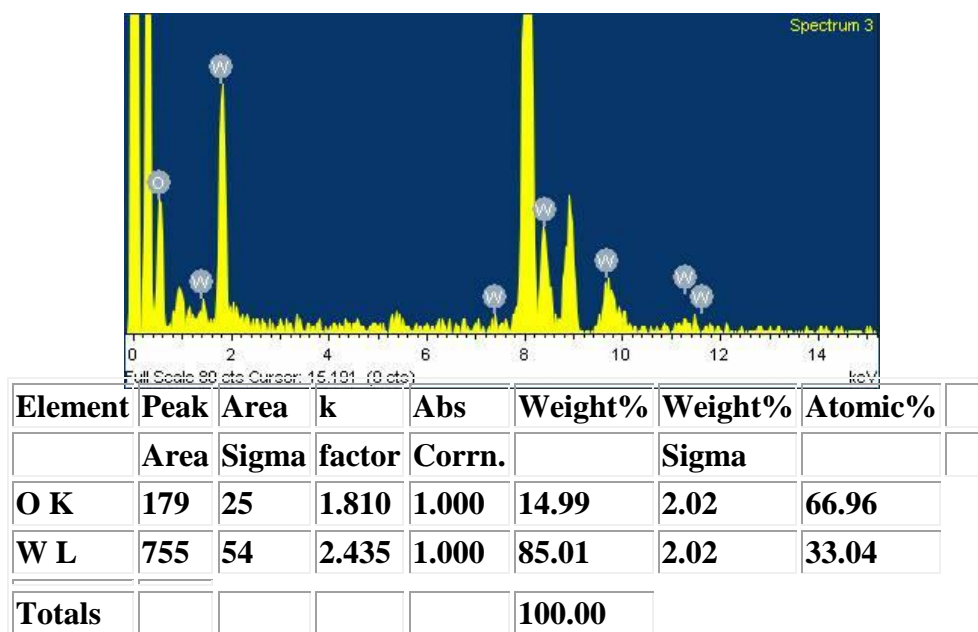

**Fig. S1:** EDAX analysis of WO<sub>3-x</sub> NRs samples shows the appreciable deficiency of oxygen from their stoichiometry.

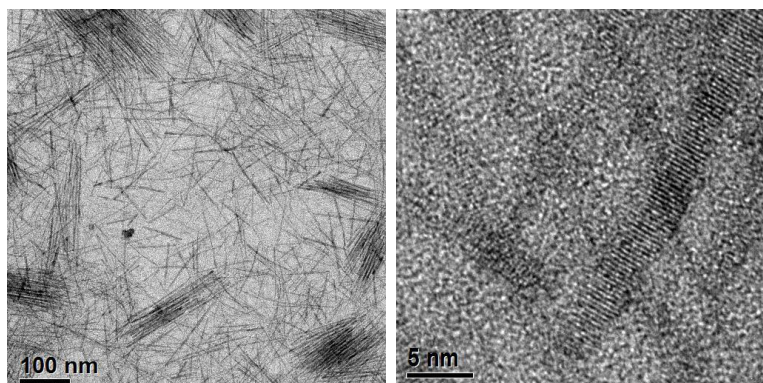

**Fig. S2:** TEM images of sub-stoichiometry WO<sub>3-x</sub> nanorods synthesized using NMO as the oxidizing agent. (B) HRTEM image of nanorods shows the width of rods < 3 nm with corroded surface.

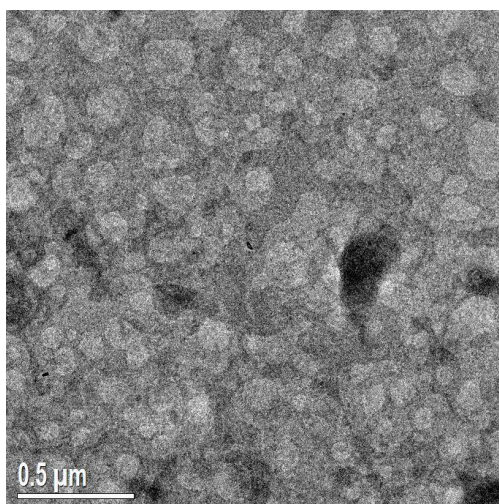

**Fig. S3:** TEM image of the intermediate blue colored compound after the oxidation of  $W(CO)_6$  at 90 °C by TMNO. The compound was found to be amorphous.

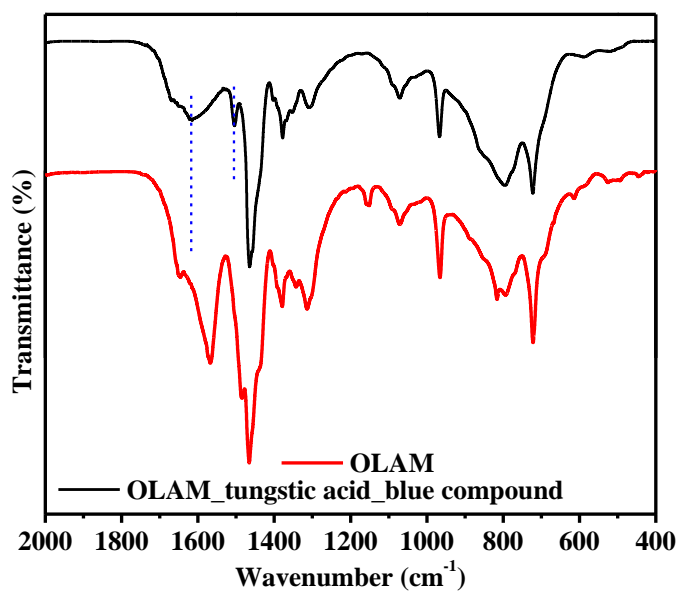

**Fig. S4:** Two new peaks at 1508  $cm^{-1}$  and 1617  $cm^{-1}$  in the isolated blue compound which is the mixture of OLAM and as-formed tungstic acid are related to  $-NH_3^+$  species<sup>1</sup>. Which also indicate the formation of  $C_{18}-NH_3^+-H_2WO_4$  complex (blue colored intermediate compound in the reaction).

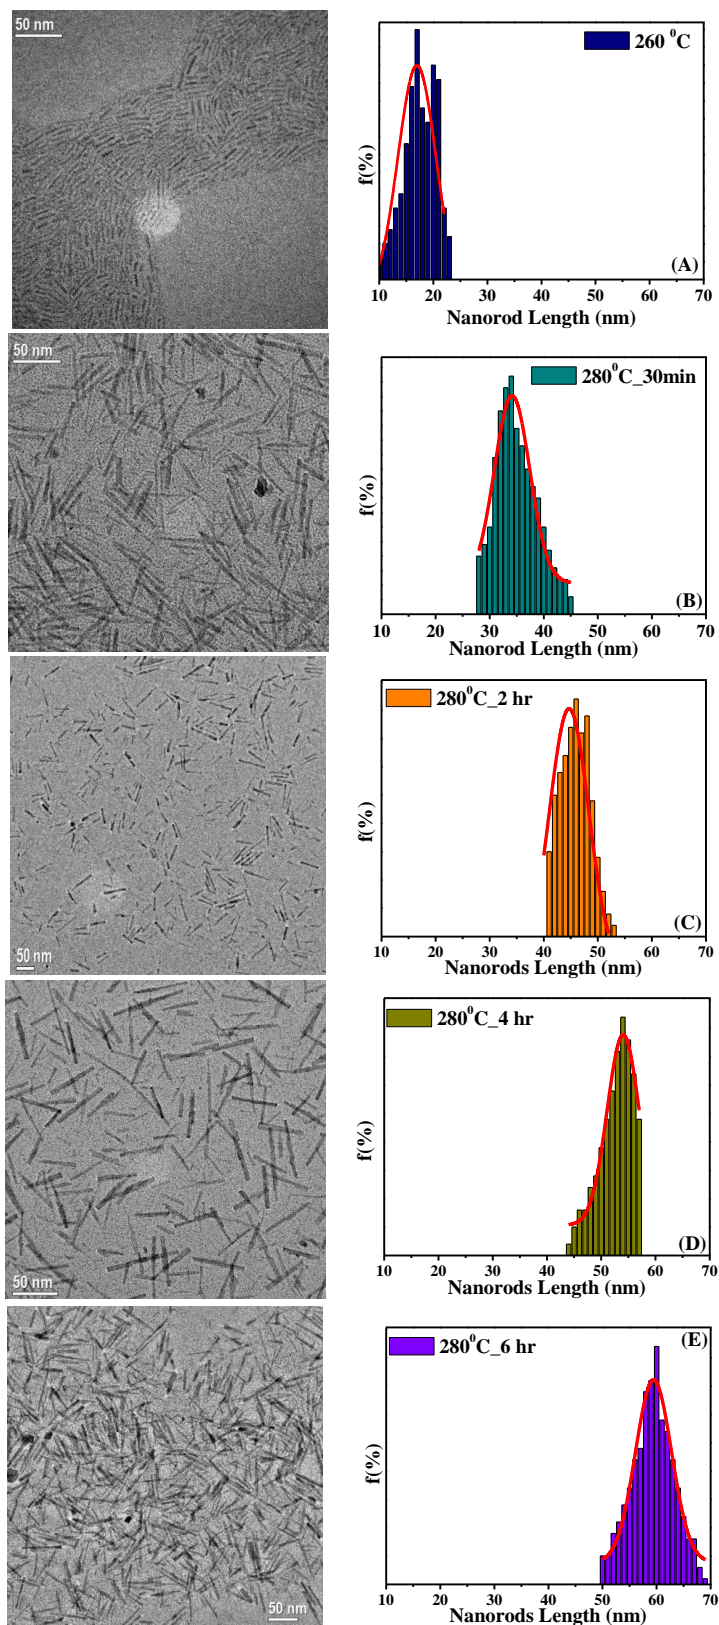

**Fig. S5:** Temporal growth evolution of  $\text{WO}_{3-x}$  nanorods at different time intervals.

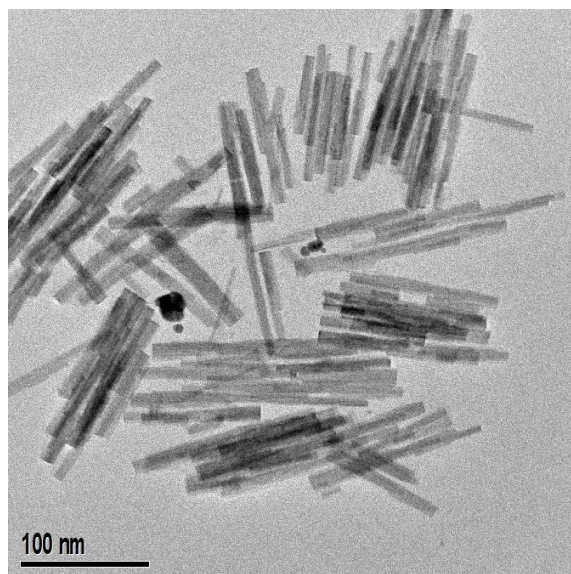

**Fig. S6:** TEM image of  $\text{WO}_{3-x}$  NRs using hexadecylamine instead of OLAM in similar reaction condition. Nanorod thickness was found to be increased 3-4 times than OLAM used nanorods.

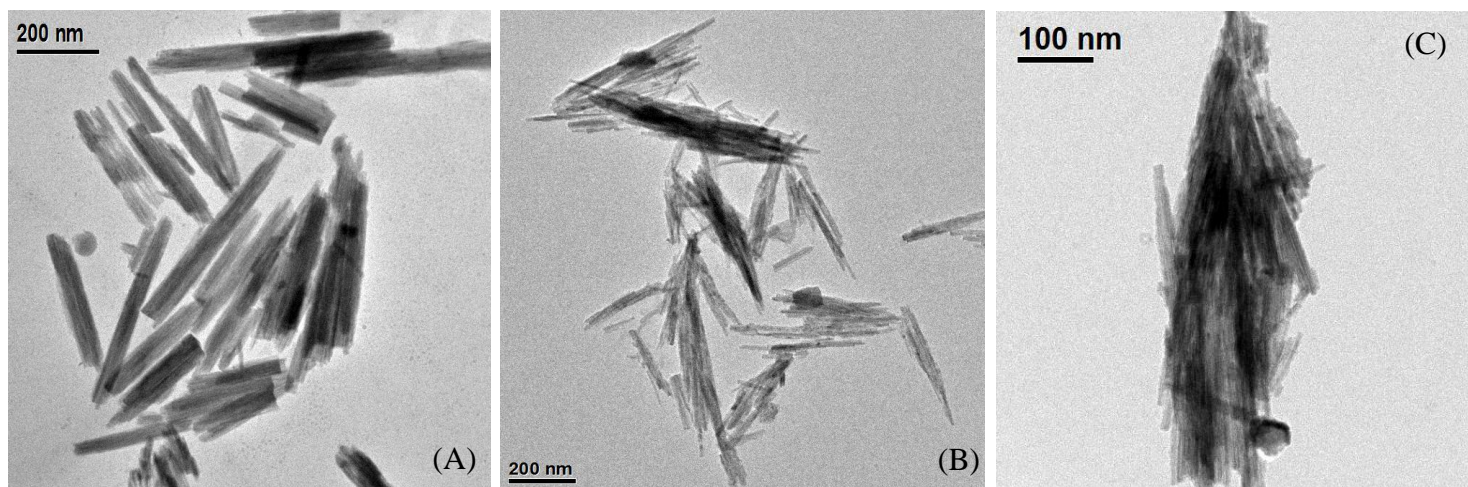

**Fig. S7:** TEM images of  $\text{WO}_{3-x}$  products using (A) 14 mmol OLAM + 7 mmol OLAC (oleic acid); (B) 10.5 mmol OLAM + 10.5 mmol OLAC; (C) 7 mmol OLAM + 14 mmol OLAC.

We fitted the experimental absorbance spectra of WO<sub>3-x</sub> nanorods based on semiclassical Drude model.

The LSPR frequencies predicted by the classical Drude model are given by:

$$\omega_p = \left[ \left\{ \frac{N_e e^2}{\epsilon_0 m_e (\epsilon' + 2\epsilon_m)} \right\} - \gamma^2 \right]^{1/2} \quad (1)$$

Where, N<sub>e</sub> is the free electron density, e is the electron charge, ε<sub>0</sub> is the permittivity of vacuum, ε<sub>m</sub> is the dielectric constant of the medium (2.656 for CS<sub>2</sub>), m<sub>e</sub> = 1.2 m<sub>0</sub> is the mass of an electron in WO<sub>3</sub>, ε' is high frequency dielectric constant (5.88 for WO<sub>3</sub>)<sup>2</sup> and γ = γ<sub>bulk</sub> is the bulk scattering frequency.

The scattering frequency is modified by the size –dependent surface scattering as follows:

$$\gamma = \gamma_{bulk} + \frac{AV_F}{r} \quad (2)$$

Here, V<sub>F</sub> is the Fermi velocity, r is the size of nanocrystals obtained from the TEM images and A is an empirical constant whose value is debated in the literature.

The absorbance due to Plasmon resonance is given by

$$A = \epsilon_m^{3/2} \omega \sum_i \frac{\frac{Im(\epsilon)}{P_i^2}}{\left( Re(\epsilon) + \frac{(1 - P_i)\epsilon_m}{P_i} \right)^2 + Im(\epsilon)^2} \quad (3)$$

where ω is the angular frequency of incident light, ε<sub>m</sub> is the dielectric constant of the medium, ε is the dielectric function of WO<sub>3</sub>, and the P<sub>j</sub> are the depolarization factors for axis x, y, and z of the three dimensional system .

Where ε can be given by,

$$\epsilon = 1 - \frac{\omega_p^2}{\omega^2 + j\gamma\omega} \quad (4)$$

The de-polarization factor in a direction can be given by,

$$P_x = \frac{(1-S^2)}{S^2} \left[ \frac{1}{2S} \ln \left( \frac{1+S}{1-S} \right) - 1 \right] \quad (5)$$

And

$$P_y = P_z = \frac{(1-P_x)}{2} \quad (5a)$$

And the geometric factor appeared in equation (5) S is defined as,

$$S = \left( 1 - \frac{1}{R^2} \right)^{\frac{1}{2}}$$

Where R is the aspect ratio which is taken to 18.

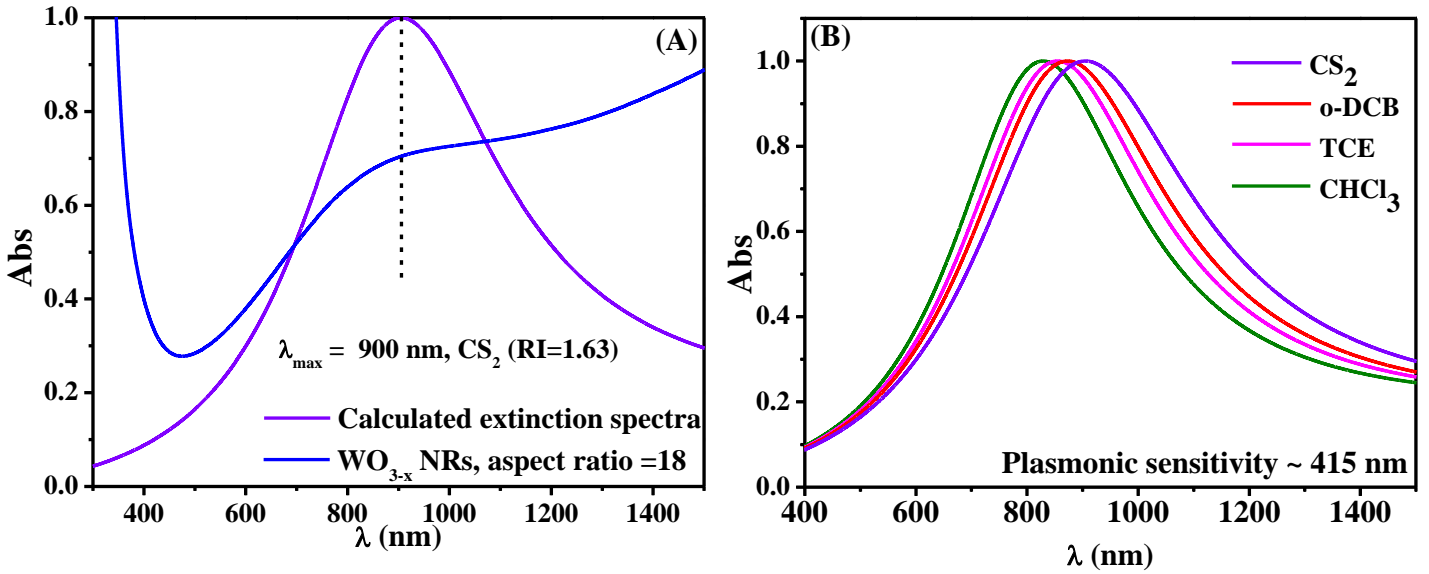

**Fig. S8:** (A) plot of calculated extinction spectra of  $WO_{3-x}$  NRs in  $CS_2$  solvent from the above formulae using MATLAB program taking aspect ratio =18 (from TEM image) and experimental observed spectra in same solvent.

(B) Calculated extinction spectra of  $WO_{3-x}$  NRs in different solvent ( $N_e = 6.1 \times 10^{27} \text{ m}^{-3}$ ).

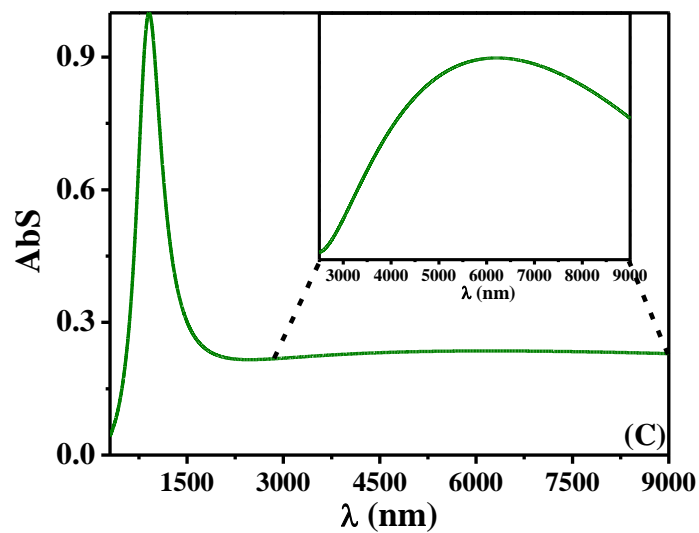

**Fig. S8:** (C) calculated extinction spectra of  $\text{WO}_{3-x}$  NRs in UV to IR region. Inset shows the enlarged view of spectra in 3000 nm to 9000 nm with peak maxima  $\sim 6000\text{nm}$ .

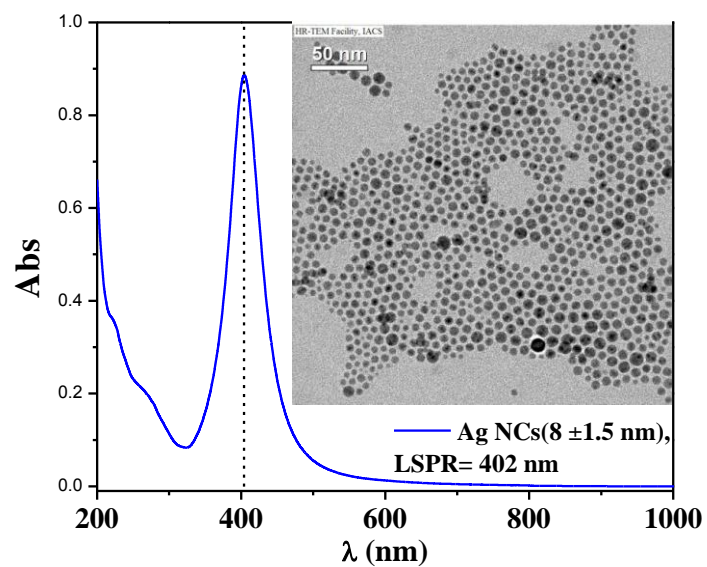

**Fig. S9:** Absorbance spectra of OLAM capped Ag NCs (Size  $8 \pm 1.5$  nm) dispersed in  $\text{CS}_2$ . Inset shows the TEM image of the Ag NCs.

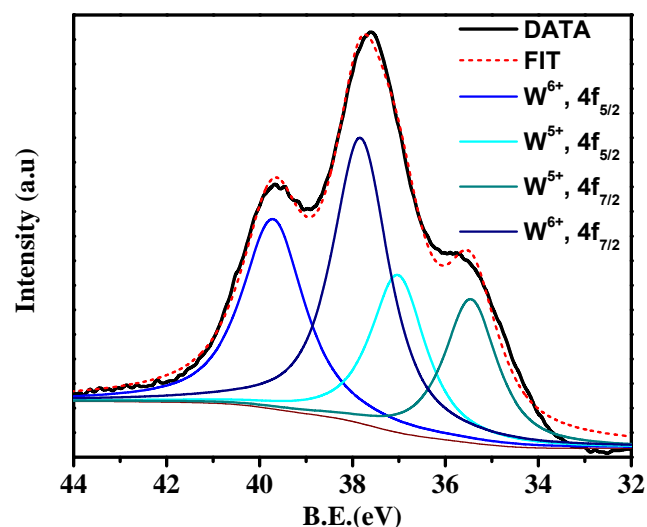

**Fig. S10:** Deconvoluted HRXPS spectra of Ag(2nm)/WO<sub>3-x</sub> NRs shows the presence of both W+5 and W+6 states of tungsten<sup>3</sup>.

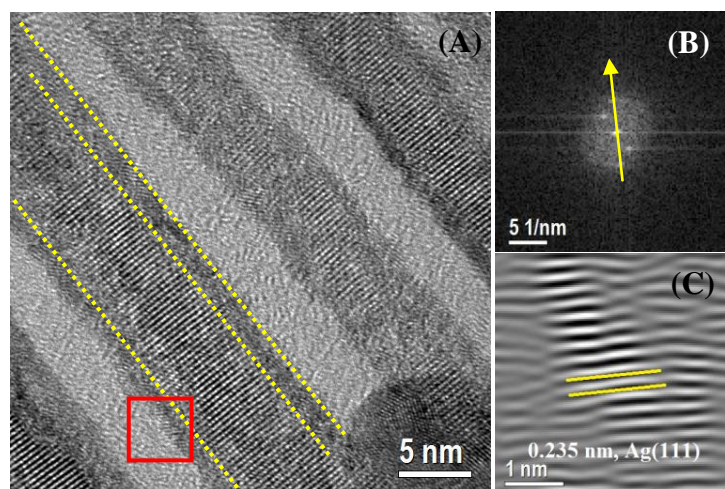

**Fig. S11:** (A) TEM image of Ag(5nm)/WO<sub>3-x</sub> heterostructure NRs upon annealing at 170°C for 10 min. Shows a change of surface structure of almost all nanorods upon exposure of electron beam for 10 s. (B) FFT pattern of red circle are in Fig (A). The value obtained from the spots (along the yellow arrow) is 0.235 nm. (C) The simulated HRTEM image masking the yellow arrowed spots. They are the lattice fringes of Ag(111) plane. The surface of other rods also shows the presence of Ag(111) plane.



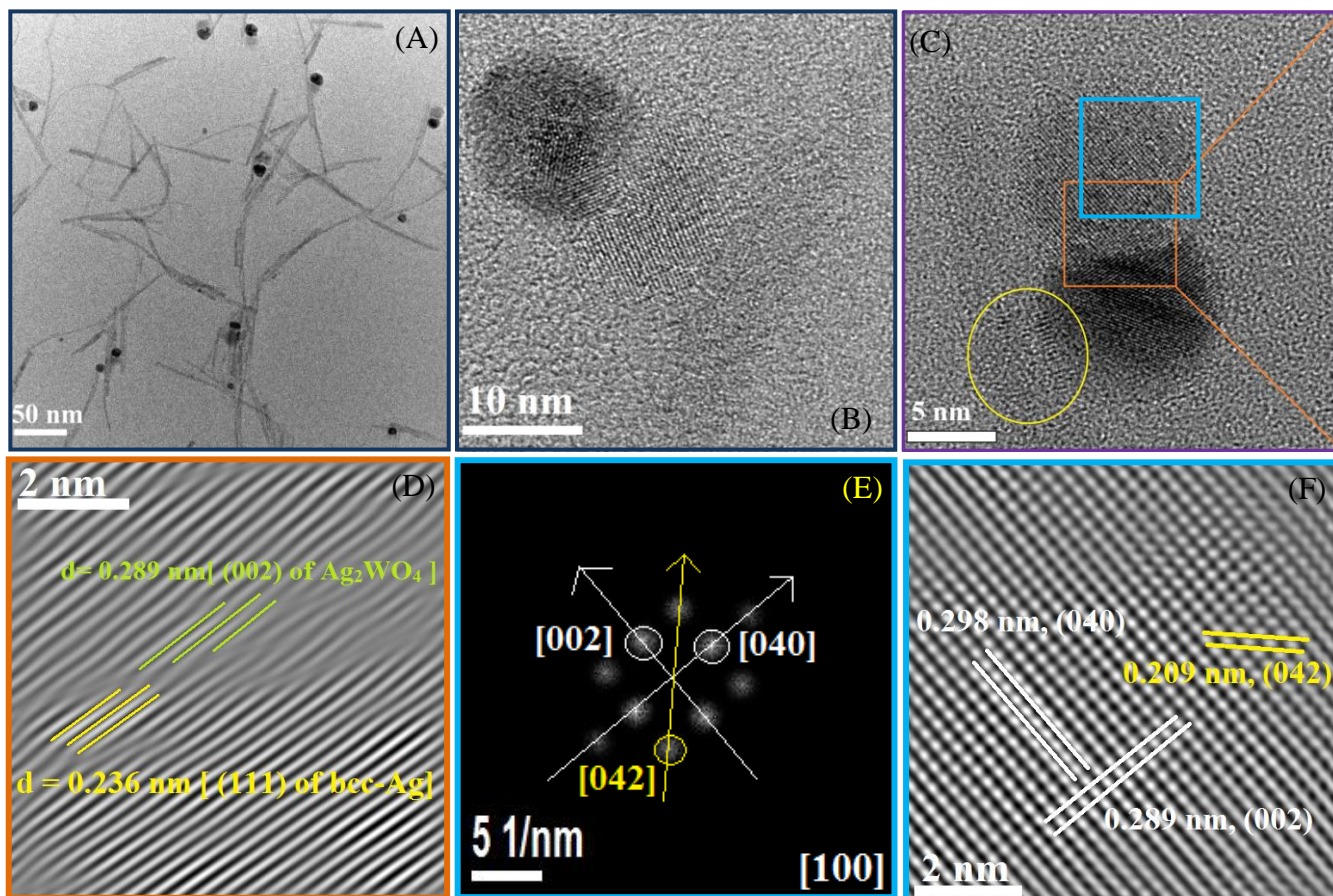

**Fig. S12:** (A) Large area TEM image of Ag/ $\alpha$ -Ag<sub>2</sub>WO<sub>4</sub> heterodimer formed by reaction of roughed surface thin WO<sub>3-x</sub> nanorods or nanowire and Ag-OLAM solution on plasmonic photocatalysis followed by thermal annealing process. (B) and (C) shows the closer view (HRTEM) of two heterodimer. Both the heterodimers are situated with carbon-skin of capping agent (amorphous) which is formed when the crystalline WO<sub>3-x</sub> converted to Ag<sub>2</sub>WO<sub>4</sub>. (D) The simulated HRTEM image from orange square area of Fig. (C) shows the formation of epitaxy between (111) Ag with (002) planes of Ag<sub>2</sub>WO<sub>4</sub>. (E) FFT pattern of blue squared area which is the pure WO<sub>3-x</sub> part. (F) Simulated HRTEM image shows the presence of mutual perpendicular (040) and (002) planes and (042) plane when viewed along [100] zone axis. (P n 2 n (34) – orthorhombic Ag<sub>2</sub>WO<sub>4</sub>)<sup>4,5</sup>

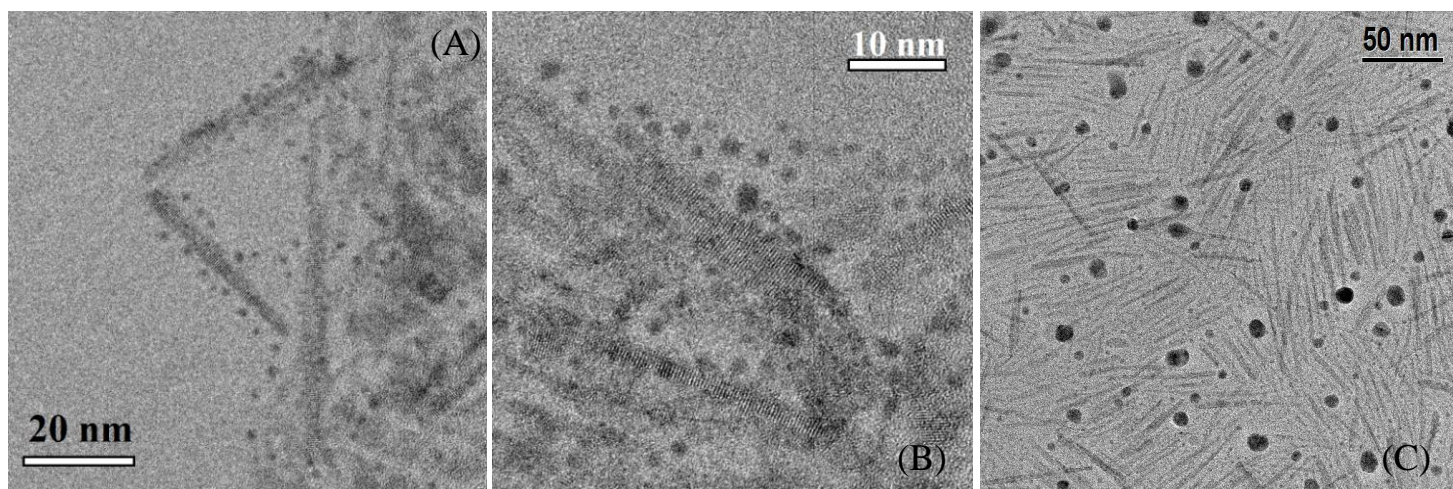

**Fig. S13:** (A) TEM image of Au/  $\text{WO}_{3-x}$  NRs when  $\text{HAuCl}_4$ \_OLAM solution and  $\text{WO}_{3-x}$  NRs irradiated for 30 min in white light. (B) The 60 min product. In both the cases Au cluster was found to be detached from NRs. (C) TEM image of product when the 60 min photocatalysed product was annealed at 170 °C for 30 min

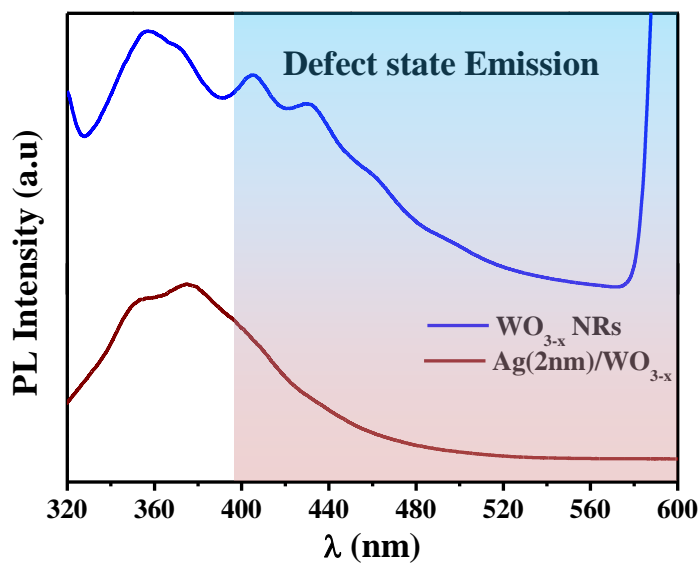

**Fig. S14:** The photoluminescence spectra of pure  $\text{WO}_{3-x}$  nanorods and Ag (2nm) decorated  $\text{WO}_{3-x}$  nanorods. Band edge excitation was found at 350 nm for both the samples. Defect PLs ranging from 380 nm to 560 nm for pure  $\text{WO}_{3-x}$  was found to be quenched for Ag decorated nanorods.

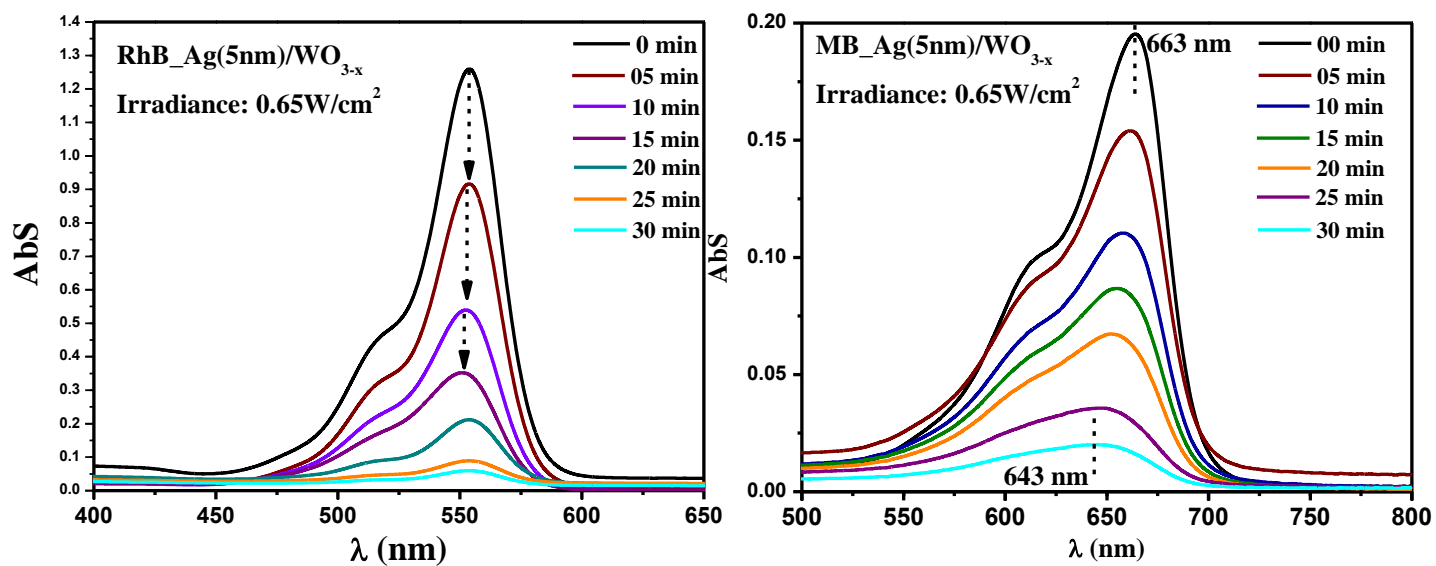

**Fig. S15:** Change of absorbance intensity of RhB and MB dye in water in presence of Ag(5nm)/WO<sub>3-x</sub> catalyst with light irradiance of 0.65W/cm<sup>2</sup>.

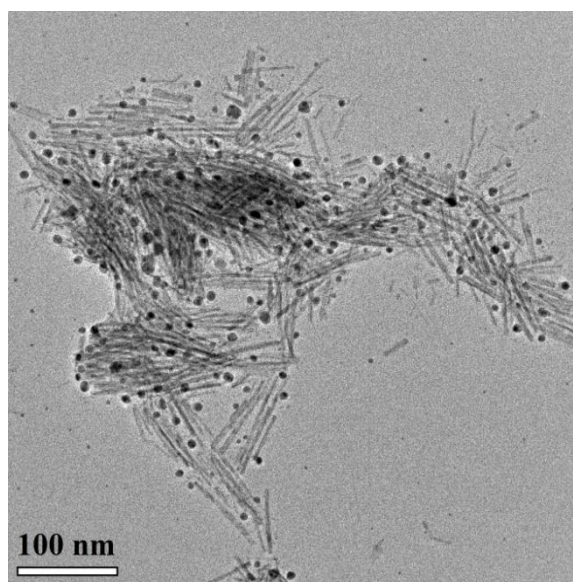

**Fig. S16:** TEM image of recovered Ag(10nm)/WO<sub>3-x</sub> NHS catalyst.

**References:**

1. B. Ingham , S. V. Chong , J. L. Tallon , *J. Phys. Chem. B*, 2005 , 109 , 4936 – 4940 .
2. Krishnaji, P. Kant, R. Srivastava, *Thin solid films*, 1975, 30, 319-323.
3. X. Chang, S. Sun, Y. Zhou, L. Dong and Y. Yin, *Nanotechnology*, 2011, **22**, 265603
4. P.M. Skarstad and S. Geller, *Materials Research Bulletin*, 1975, 10, 791-799.
5. Z. Lin, J. Li, Z. Zheng, J. Yan, P. Liu, C. Wang and G. Yang, *Acs Nano*, DOI: 10.1021/acsnano.5b02077.
